# Supplementary material for: A templating effect of carbon nanomaterials on the synthesis of Pd nanoparticles by covalent grafting onto surface O-groups
Source: Royal Society of Chemistry journal article supplement (doi:10.1039/c2jm31027a), 2012-01-01
Supplement: c2jm31027a.pdf [file c2jm31027a.pdf]

# Templating effect of carbon nanomaterials on the synthesis of Pd nanoparticles by covalent grafting onto surface O-groups

Sophie Hermans,\* Valérie Bruyr and Michel Devillers

## Electronic Supplementary Information

### S1 – Raman spectra

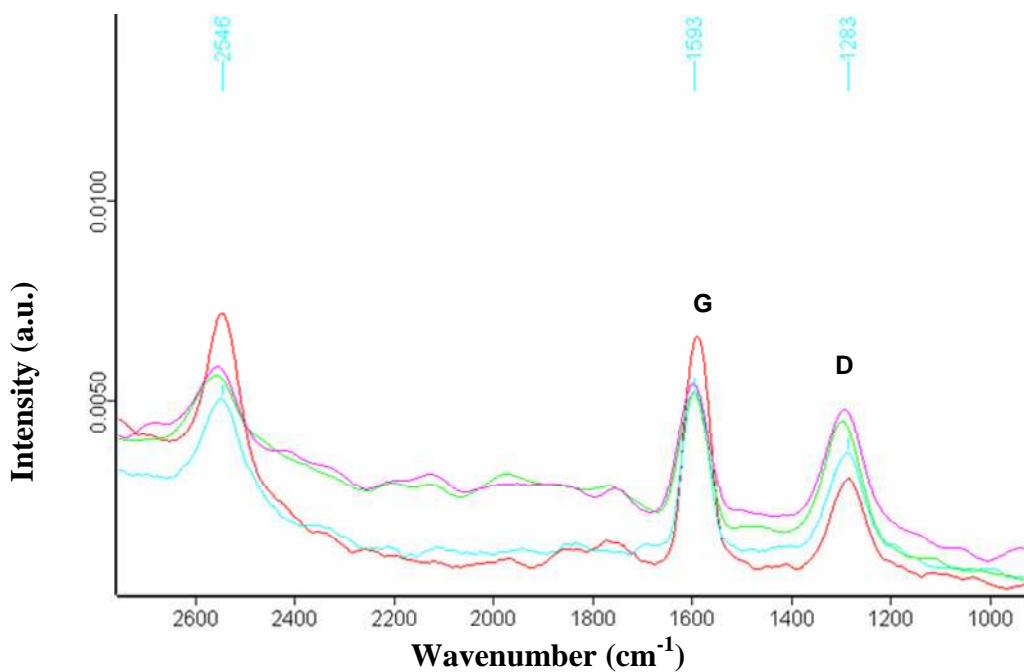

Color codes:

- thin-MWNT non modified,
- thin-MWNT treated 2 h under ultrasound at 60°C in HNO<sub>3</sub>/H<sub>2</sub>SO<sub>4</sub>,
- thin-MWNT treated 1 h under reflux in HNO<sub>3</sub>,
- thin-MWNT treated 2 h under reflux in HNO<sub>3</sub>.

## S2 – Thermogravimetric analyses of Pd complexes

| Complex                                                                                | Calculated weight loss (%) |            | Experimental weight loss | T <sub>dec</sub> (°C) |
|----------------------------------------------------------------------------------------|----------------------------|------------|--------------------------|-----------------------|
|                                                                                        | PdO residue                | Pd residue |                          |                       |
| [Pd(O <sub>2</sub> CCF <sub>3</sub> ) <sub>2</sub> bipy]                               | 75                         | 78         | 54.8                     | 270                   |
| [Pd(O <sub>2</sub> CCH <sub>3</sub> ) <sub>2</sub> (Et <sub>2</sub> NH) <sub>2</sub> ] | 67                         | 71         | 71.4                     | 170                   |

**S3 – SEM characterization of oxidized nanofibers and nanotubes after covalent grafting of the  $[\text{Pd}(\text{O}_2\text{CCF}_3)_2\text{bipy}]$  complex.**

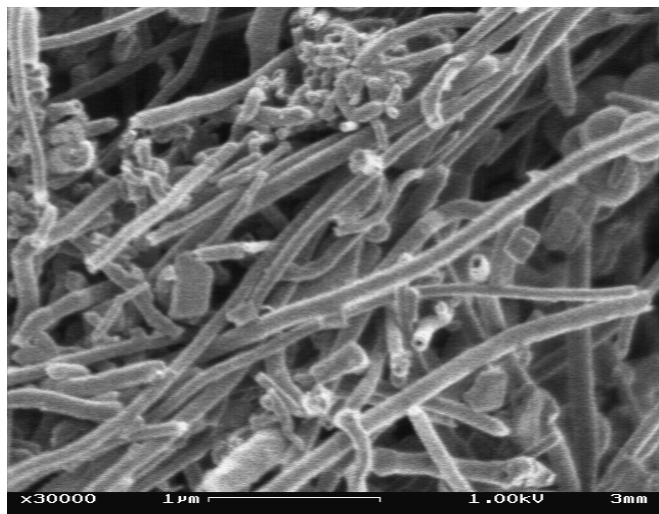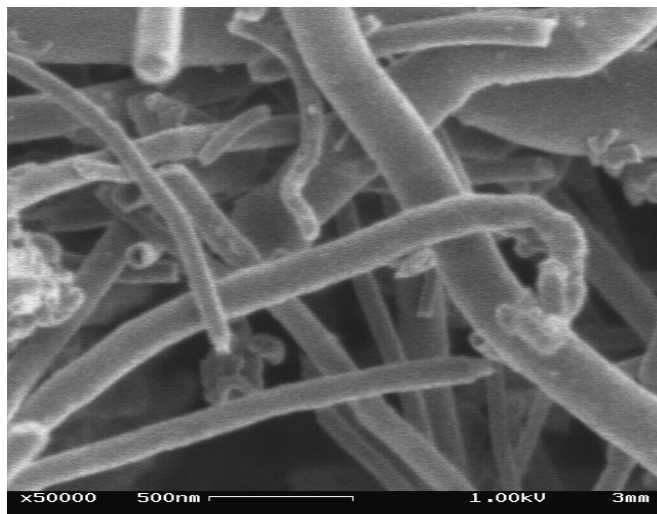

SEM images (magnification 30000x and 50000x) of  $[\text{Pd}(\text{O}_2\text{CCF}_3)_2\text{bipy}]$  grafted on CNF-XT-ox

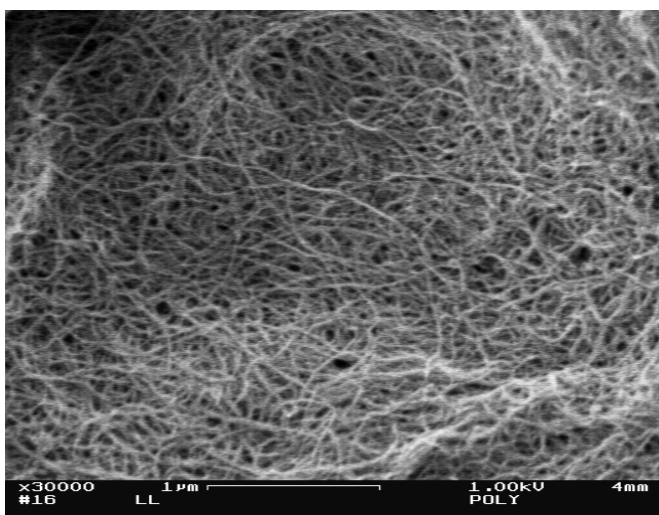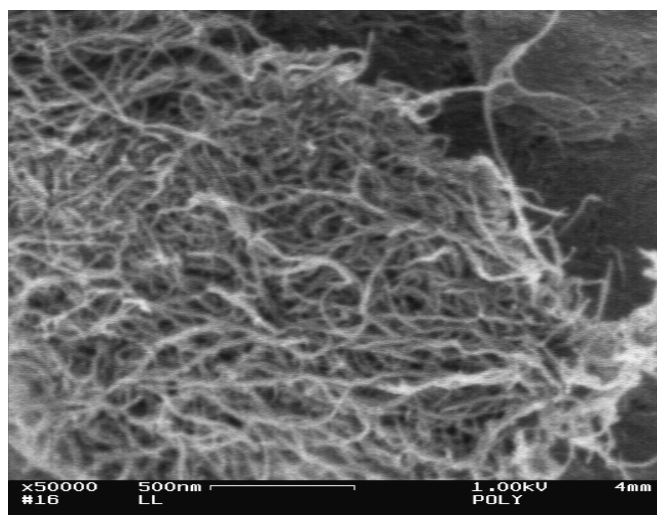

SEM images (magnification 30000x and 50000x) of  $[\text{Pd}(\text{O}_2\text{CCF}_3)_2\text{bipy}]$  grafted on oxidized MWNTs

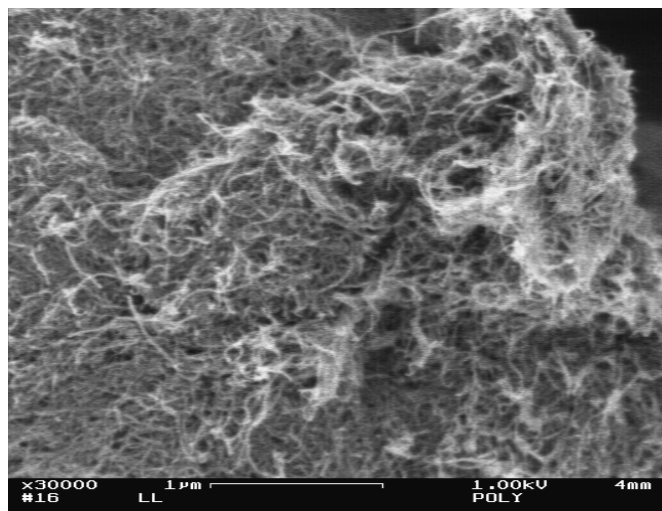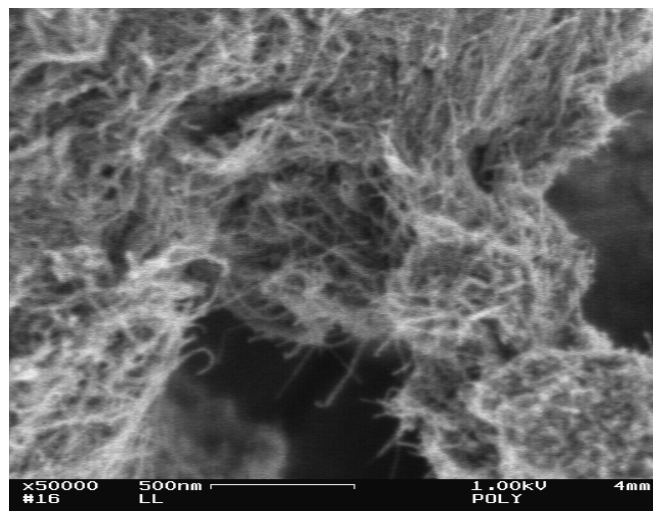

SEM images (magnification 30000x and 50000x) of  $[\text{Pd}(\text{O}_2\text{CCF}_3)_2\text{bipy}]$  grafted on oxidized thin-MWNTs

**S4 – SEM characterization of oxidized nanotubes after covalent grafting of the  
[Pd(O<sub>2</sub>CCH<sub>3</sub>)<sub>2</sub>(Et<sub>2</sub>NH)<sub>2</sub>] complex and thermal treatment.**

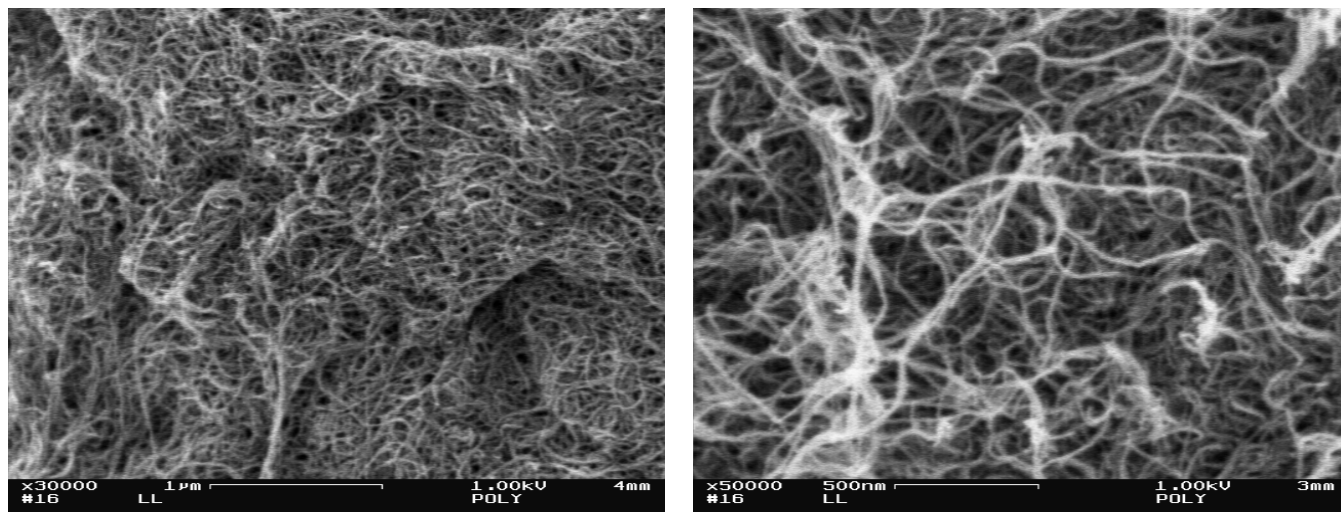

SEM images (magnification 30000x and 50000x) of [Pd(O<sub>2</sub>CCH<sub>3</sub>)<sub>2</sub>(Et<sub>2</sub>NH)<sub>2</sub>] grafted on oxidized MWNTs and thermally treated

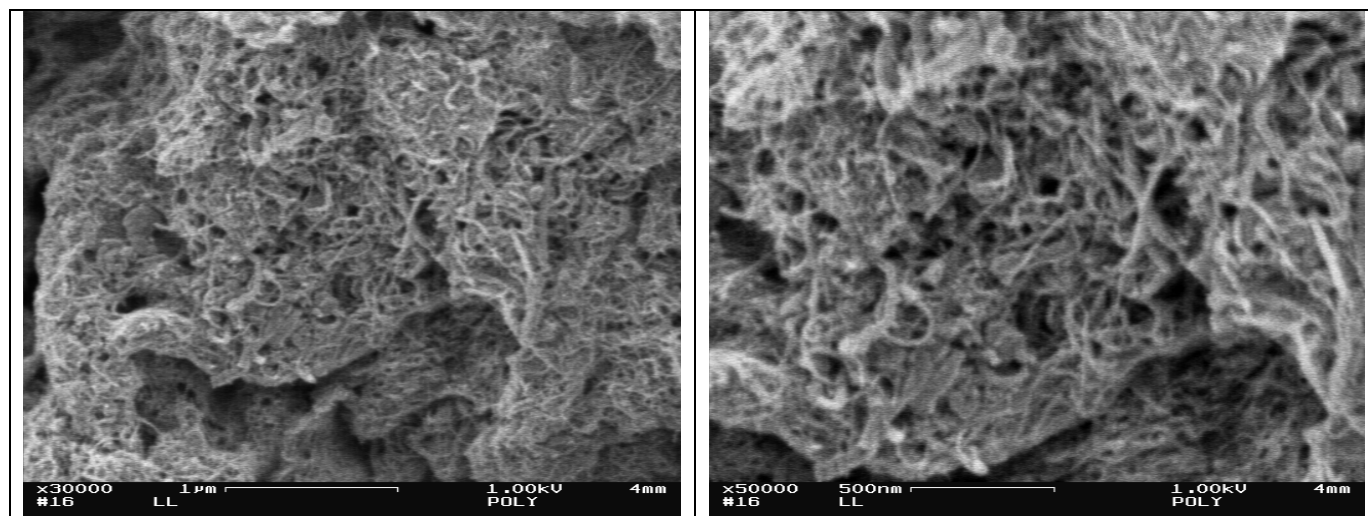

SEM images (magnification 30000x and 50000x) of [Pd(O<sub>2</sub>CCH<sub>3</sub>)<sub>2</sub>(Et<sub>2</sub>NH)<sub>2</sub>] grafted on thin-MWNTs and thermally treated

## S5 – Representative XPS spectra in selected regions

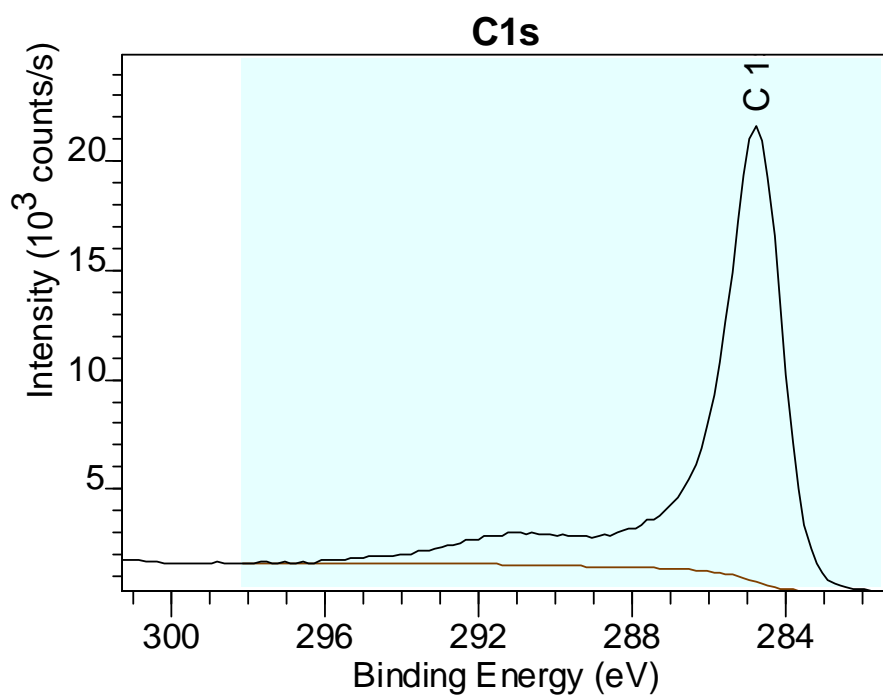

C1s XPS spectrum of as-received MWNTs.

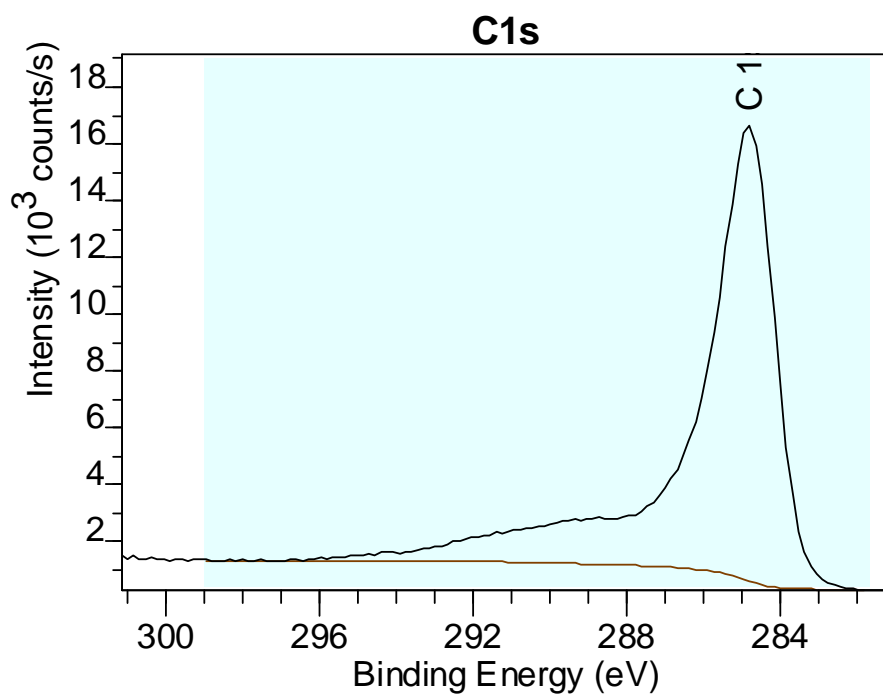

C1s XPS spectrum of oxidized MWNTs (2h refluxing HNO<sub>3</sub>).

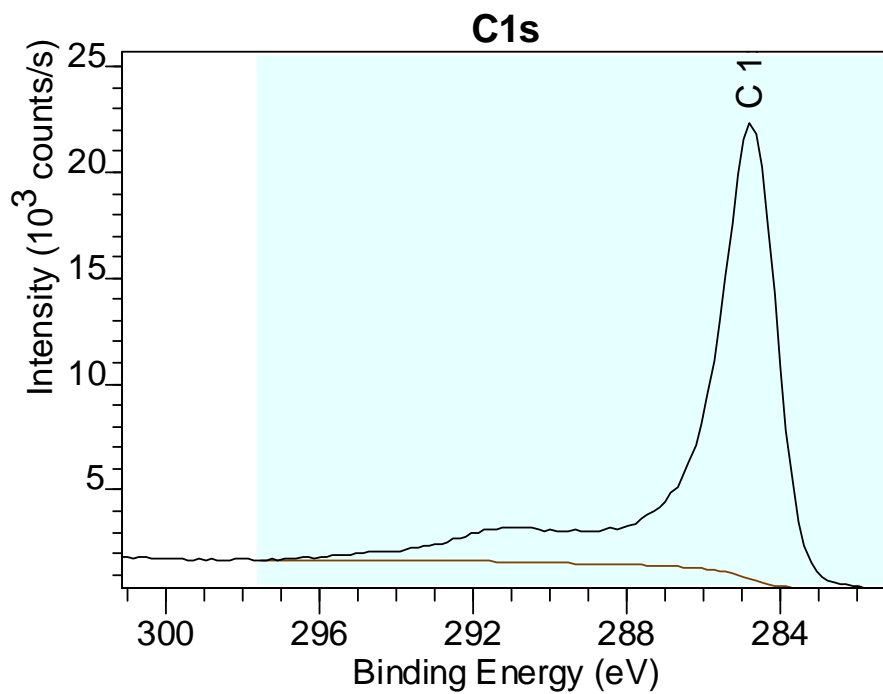

C1s XPS spectrum of as-received thin-MWNTs.

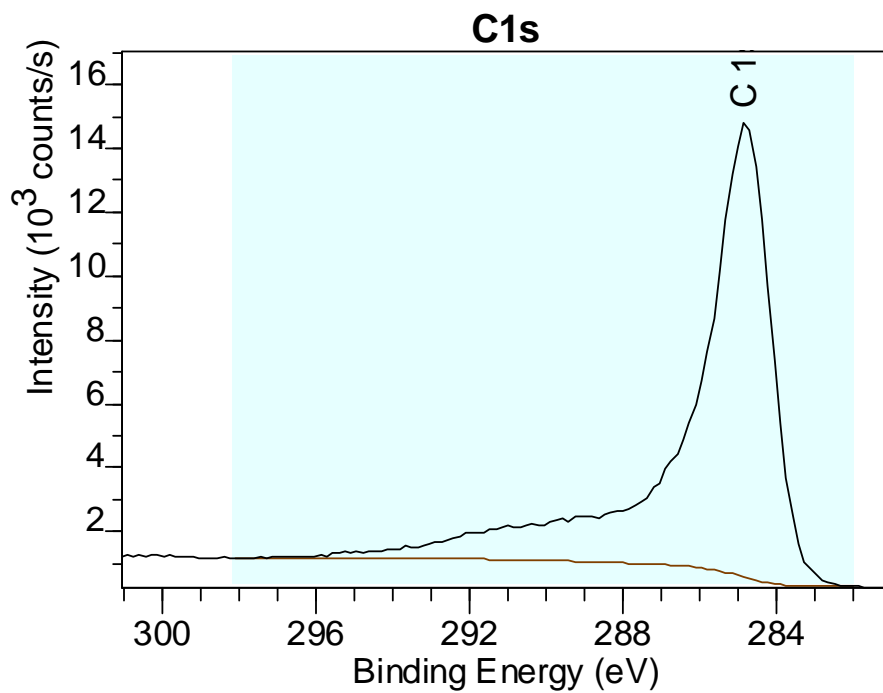

C1s XPS spectrum of oxidized thin-MWNTs (1h refluxing  $\text{HNO}_3$ ).

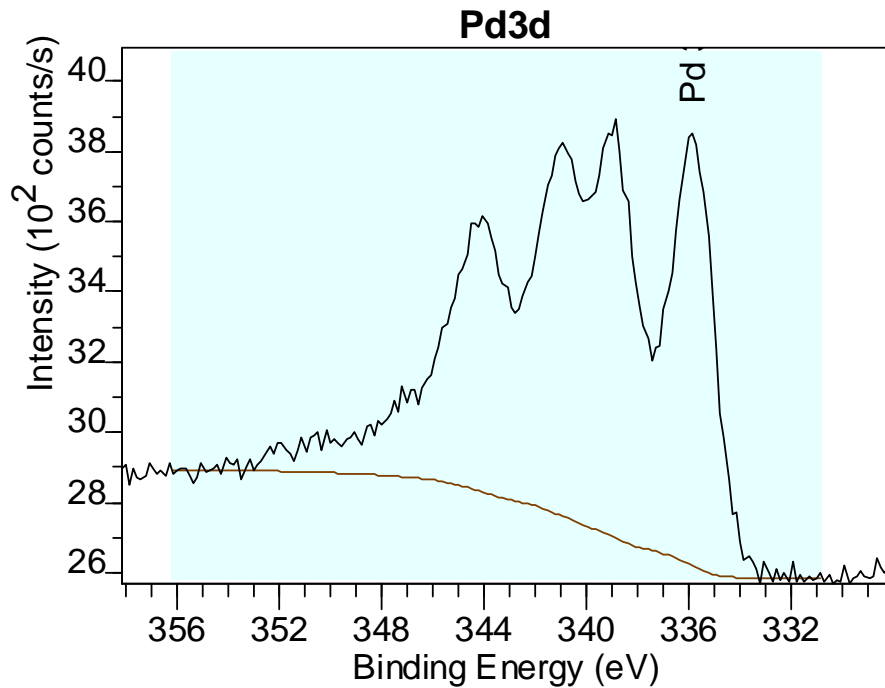

Pd3d XPS spectrum of [Pd(O<sub>2</sub>CCF<sub>3</sub>)<sub>2</sub>bipy] incorporated on pristine thin-MWNTs.

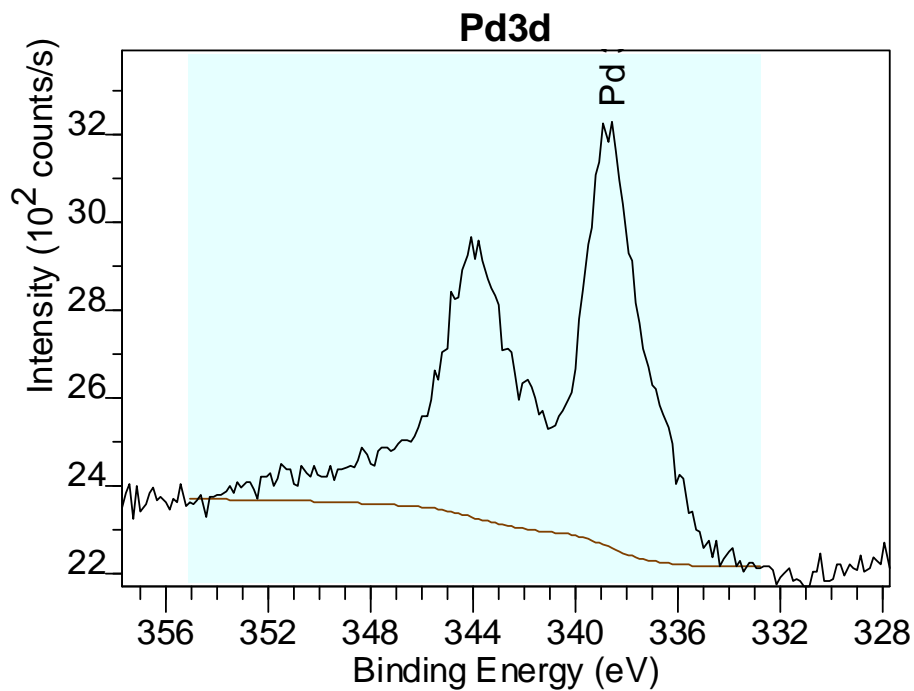

Pd3d XPS spectrum of [Pd(O<sub>2</sub>CCF<sub>3</sub>)<sub>2</sub>bipy] incorporated on oxidized thin-MWNTs (1h refluxing HNO<sub>3</sub>).



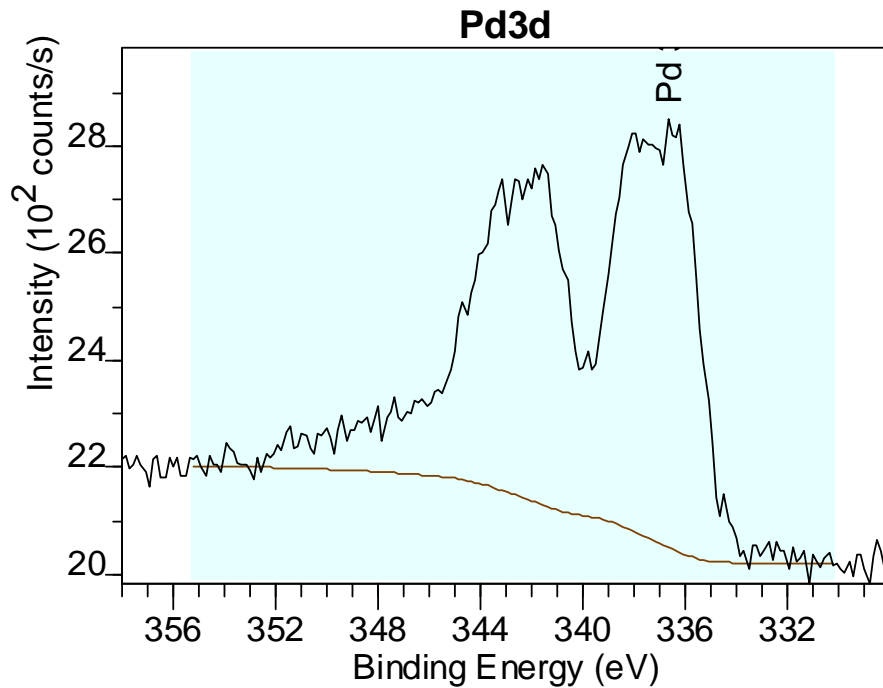

Pd3d XPS spectrum of  $[\text{Pd}(\text{O}_2\text{CCH}_3)_2(\text{Et}_2\text{NH})_2]$  incorporated on oxidized thin-MWNTs (1h refluxing  $\text{HNO}_3$ ).

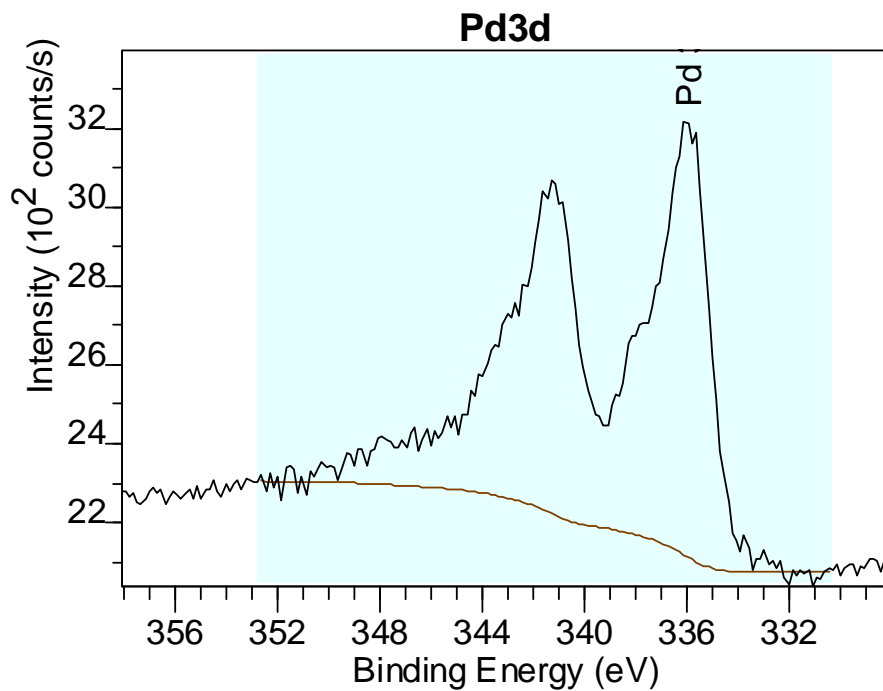

Pd3d XPS spectrum of  $[\text{Pd}(\text{O}_2\text{CCH}_3)_2(\text{Et}_2\text{NH})_2]$  incorporated on oxidized thin-MWNTs after thermal treatment.
